# Supplementary material
Source: PubMed Central journal article supplement (PMC10742343)
Supplement: NIHMS1941948-supplement-1.pdf [file NIHMS1941948-supplement-1.pdf]

**Cell Reports, Volume 42**

**Supplemental information**

**Fibroblast activation protein drives  
tumor metastasis via a protease-independent  
role in invadopodia stabilization**

**Maurish Bukhari, Navneeta Patel, Rosa Fontana, Miguel Santiago-Medina, Yike Jiang, Dongmei Li, Kersi Pestonjamas, Victoria J. Christiansen, Kenneth W. Jackson, Patrick A. McKee, and Jing Yang**

# HMLE-TWIST1

---

**shCtrl**

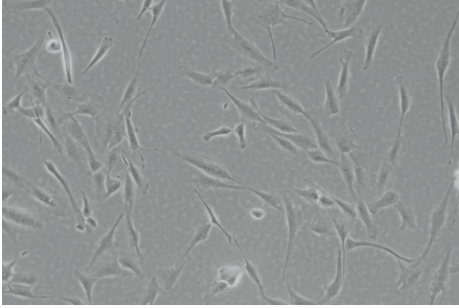

**FAP sh3**

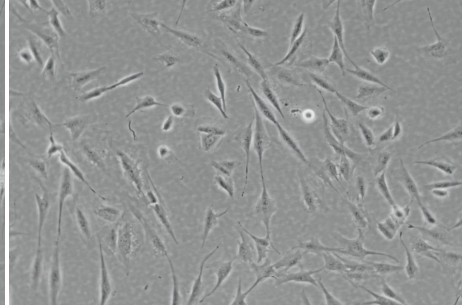

**FAP sh5**

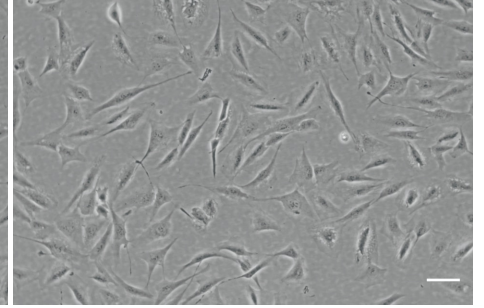

**Supplemental Figure 1. FAP is not required for TWIST1-induced EMT, Related to Figure 2.** TWIST1 was exogenously expressed in HMLE cells expressing the indicated shRNAs. All cells underwent EMT within 15 days after introduction of TWIST1, as shown in bright-field images. Scale bar represents 100 $\mu$ m.

# A

## MDA-MB-231 - src Y530F

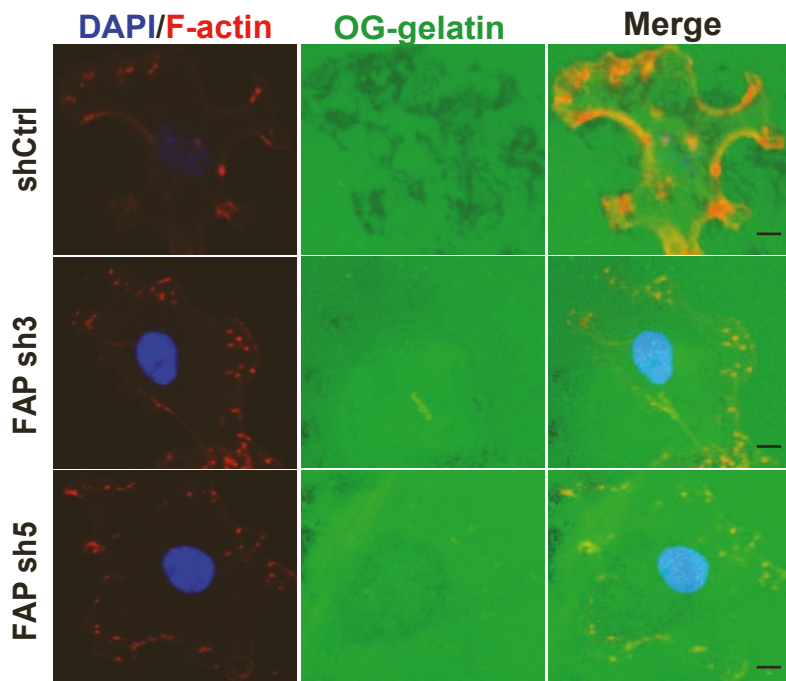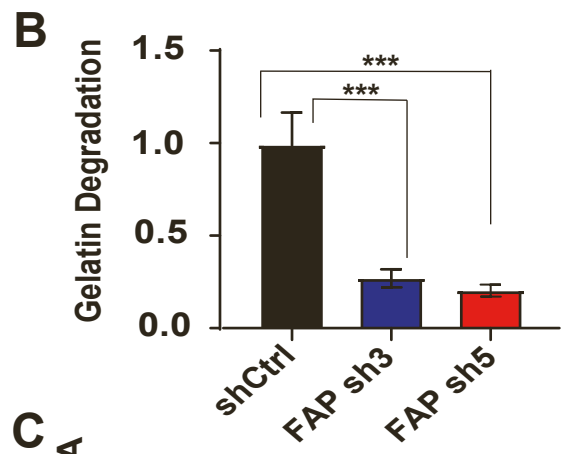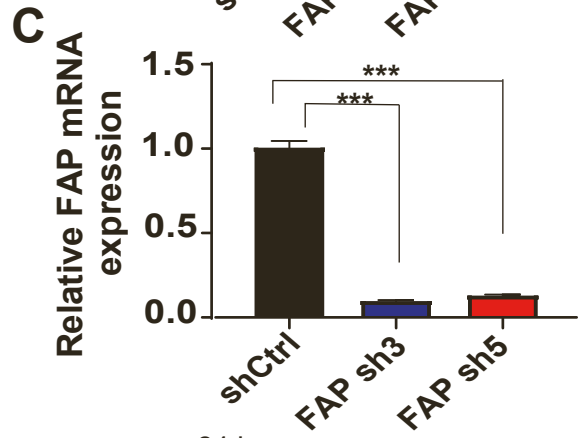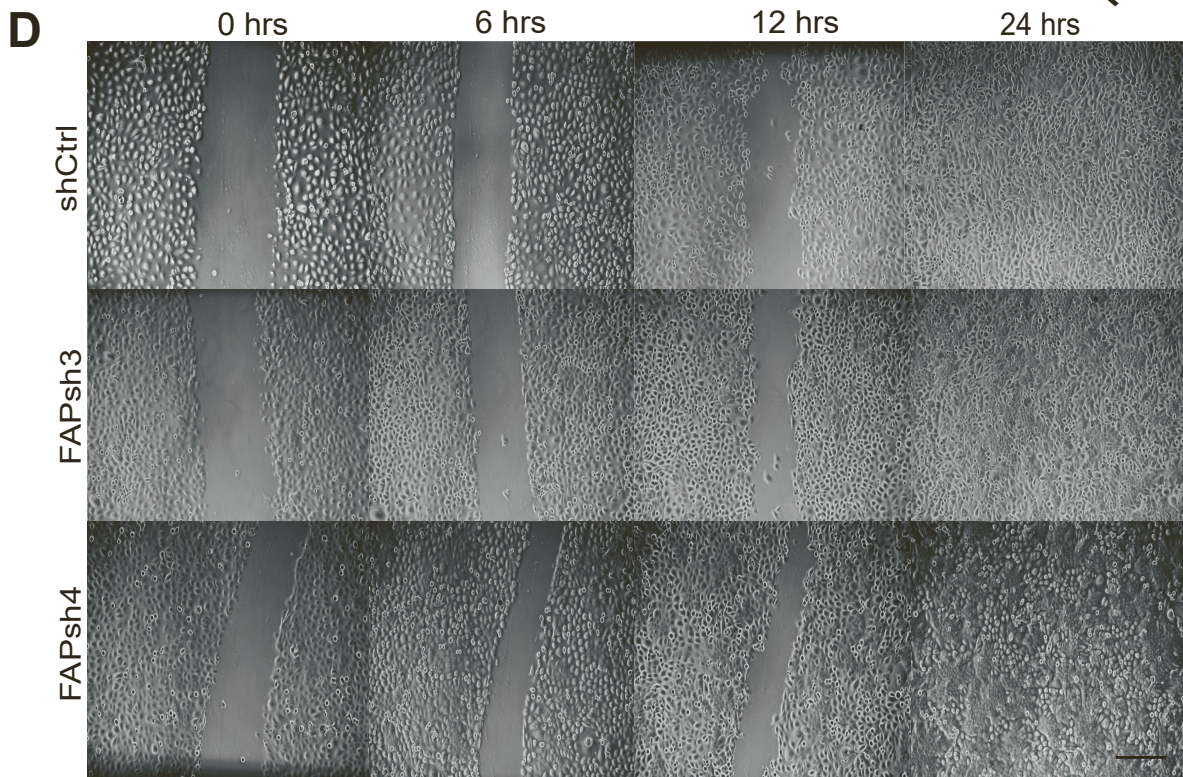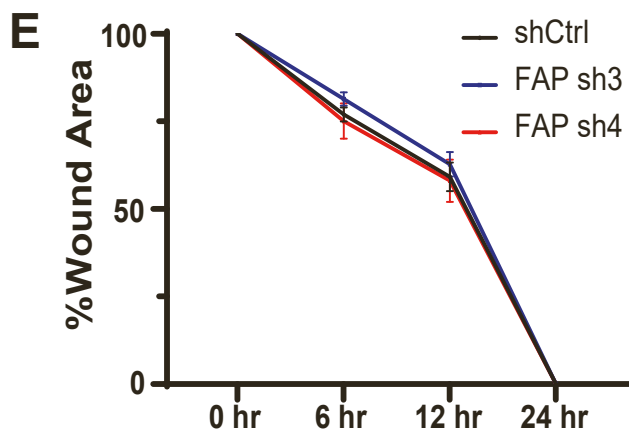

**Supplemental Figure 2. FAP plays an essential role in promoting ECM degradation, but not cell migration, Related to Figure 3.** A) MDA-MB-231SRCY530F cells expressing FAP shRNAs were plated on Oregon green conjugated gelatin for 4 hours and subsequently fixed and stained for F-actin (red) and nuclei (blue). Scale bar represents 10 $\mu$ m. B) Quantification of gelatin degradation from (A) normalized to control shRNA. Error bars represent SEM. N = 150 cells per group. \*\*p < 0.01, \*\*\*p < 0.001. Student's t-test. C) qRT-PCR measurement of FAP mRNA levels in MDA-MB-231 SRCY530F cells expressing shRNAs targeting FAP. Error bars represent standard deviation (SD). D) SCC61 cells expressing the indicated FAP shRNAs were grown to confluency, and then a p1000 pipette tip was dragged through the confluent monolayer, creating a "wound." The cells were monitored over the next 24 hours. Scale bar represents 100 $\mu$ m. E) Quantification of wound area closure in triplicate experiments. Error bars represent SEM.

# A SUM1315

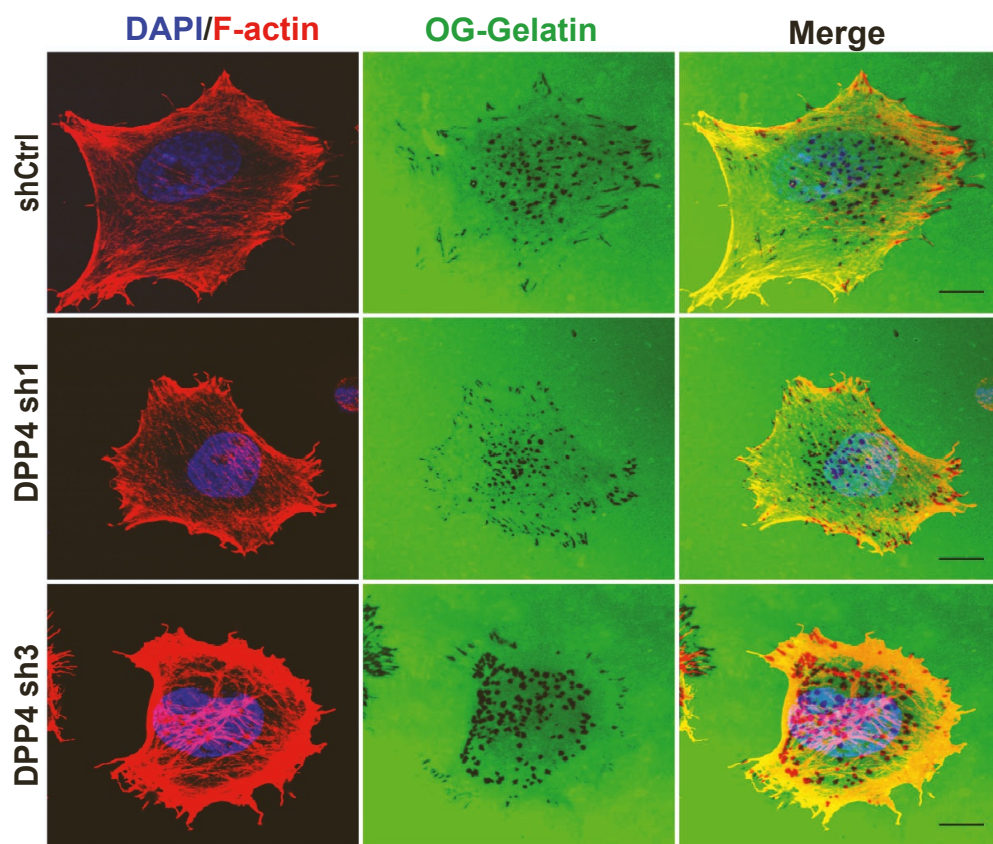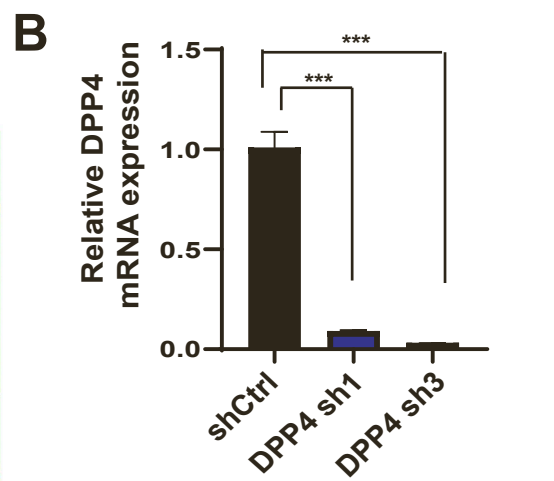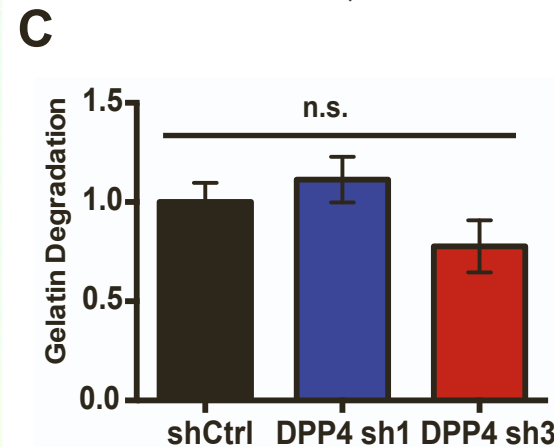

# D SCC61

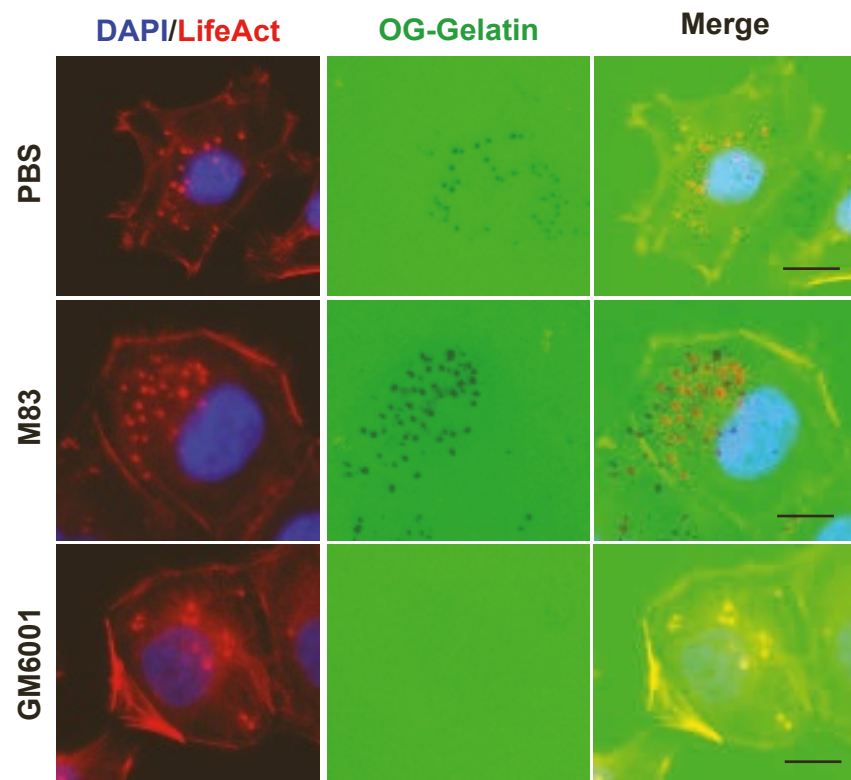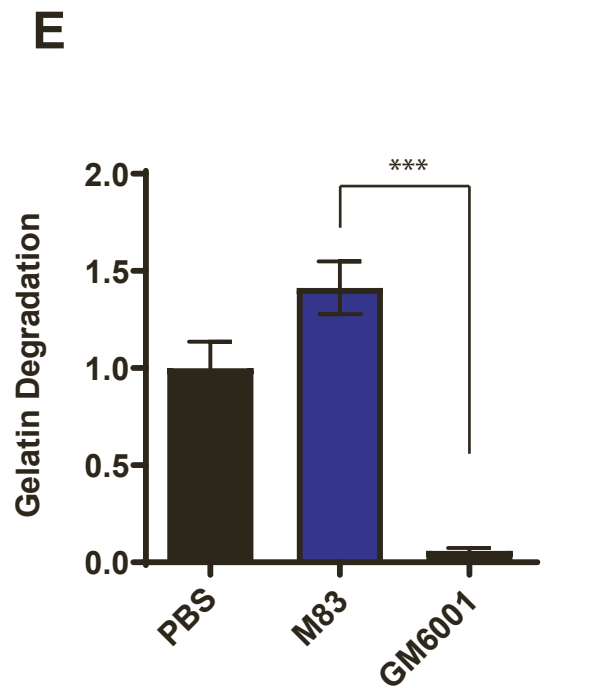

**Supplemental Figure 3. FAP is required for ECM degradation independent of its proteolytic activity, Related to Figure 4.** A) SUM1315 cells expressing the DPP4 shRNAs were seeded onto Oregon Green-labeled gelatin for 6 hours. Cells were then fixed and stained for F-actin (red), and nuclei were stained with DAPI (blue). B) Quantification of DPP4 mRNA in SUM1315 cells expressing either a control shRNA, or shRNAs targeting DPP4. C) Quantification of gelatin degradation from (A) and normalized to control shRNA. N = 150 cells per group. Error bars represent SEM. \*\*p < 0.001, ns: not significant (p > 0.05). Student's t-test. D) SCC61 cells were seeded on Oregon green labelled gelatin for 16 hours in the presence of PBS, M83 (10µM) or GM6001 (10µM) and subsequently fixed and stained for F-actin (red) and nuclei (blue). E) Quantification of gelatin degradation from (D) normalized to PBS treatment. Error bars represent SEM. N = 150 cells per group. \*\*p < 0.01, \*\*\*p < 0.001. Student's t-test. Scale bar represents 10µm.

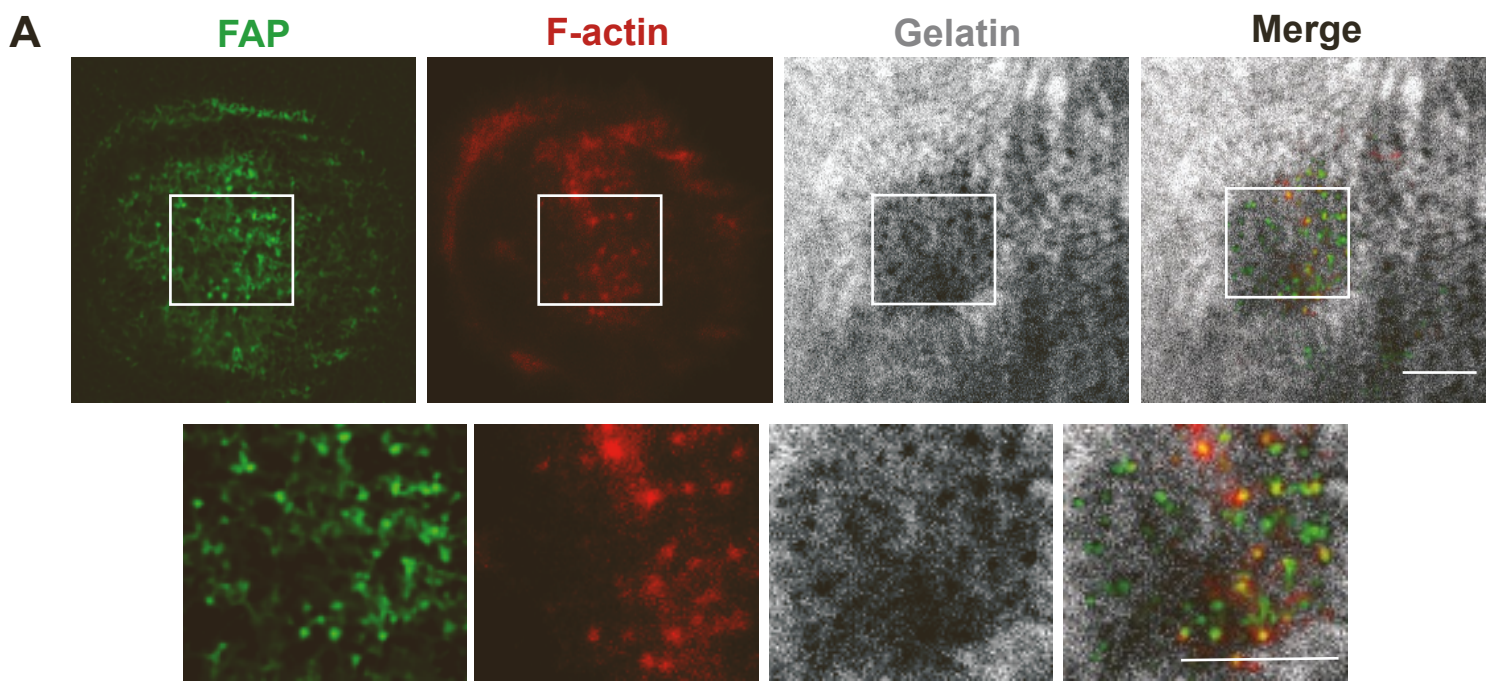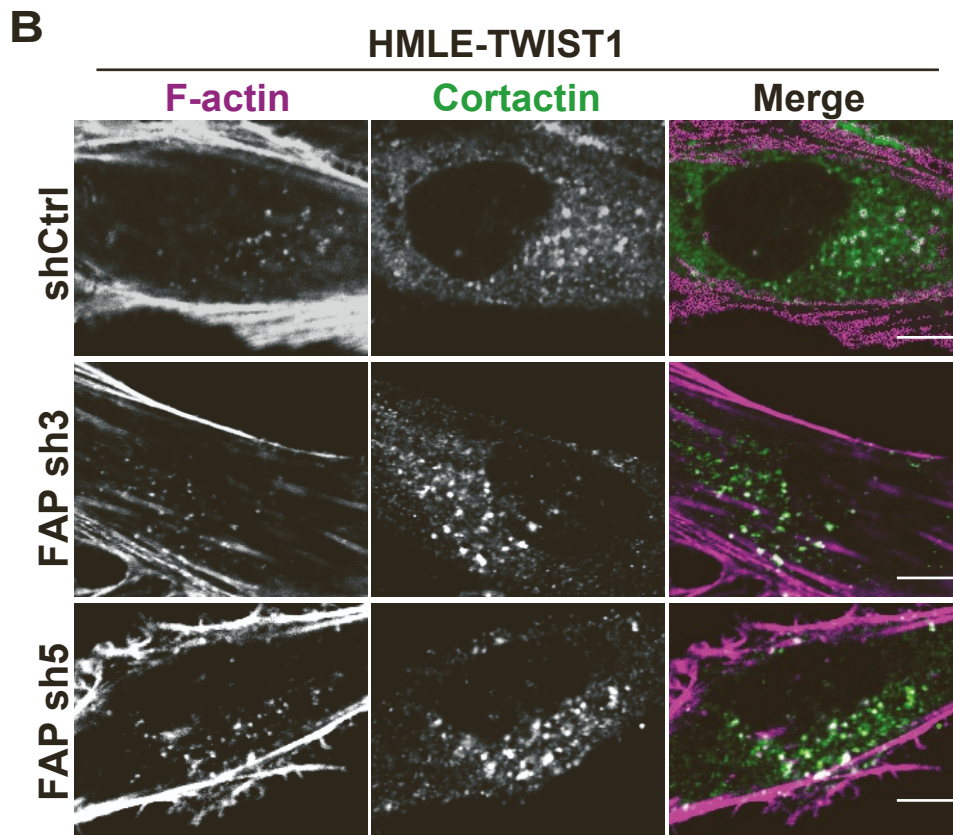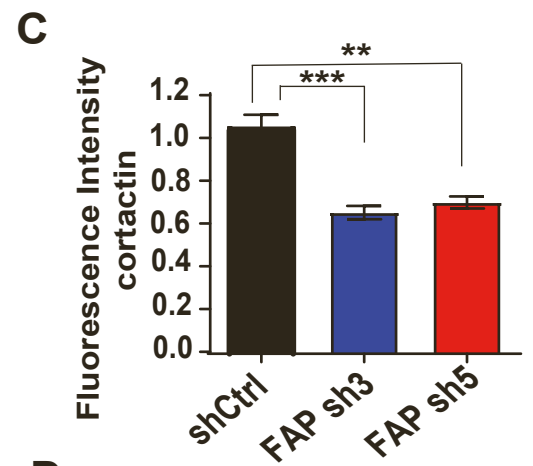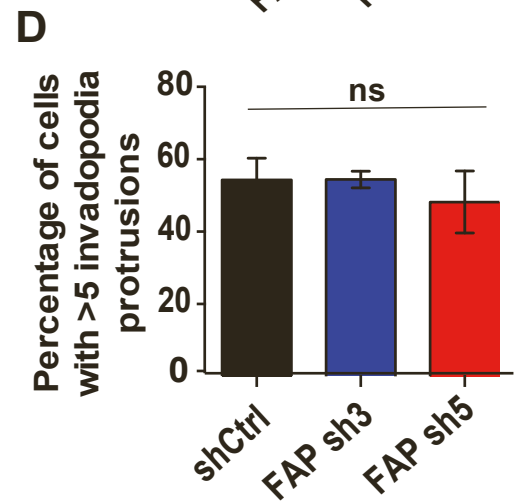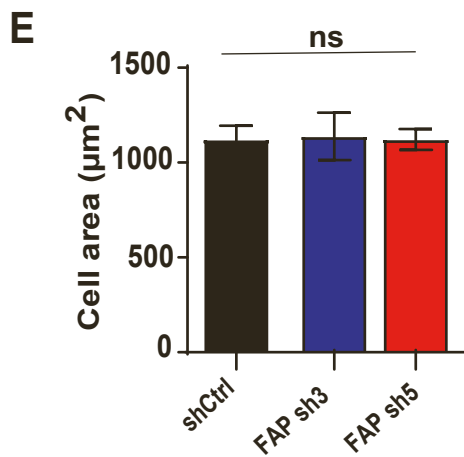



**Supplemental Figure 4. FAP knockdown affects invadopodia precursor stabilization,**

**Related to Figure 5 and 6.** A) SCC61 cells expressing CFP-FAP were seeded on Oregon Green labelled gelatin for 16 hours. Cells were then fixed and stained for F-actin (red). TIRF microscopy was used at penetration depth of 100nm to visualize FAP localization at mature invadopodia as denoted by degradation spots in gelatin. FAP image was clarified and 2D deconvolved using NIS-Elements software to improve signal to noise ratio. Insets show zoomed in view of degradation area. Scale bar represents 10 $\mu$ m. B) HMLE-TWIST1 cells expressing the indicated FAP shRNAs were seeded onto gelatin-coated coverslips for 48 hours, fixed, and stained for F-actin (magenta), cortactin (green), and nuclei (blue). Scale bar represents 10 $\mu$ m. C) Quantification of cortactin signal per invadopodia in HMLE-TWIST1 cells relative to the control shRNA. D) The percentage of cells containing >5 invadopodia was quantified. N = 300 cells per group. Error bars in C, D and E represent SEM. \*\*p < 0.01, \*\*\*p < 0.001, ns: not significant (p > 0.05). Student's t-test. E) Quantification of cell area in SCC61 cells expressing different FAP shRNAs.

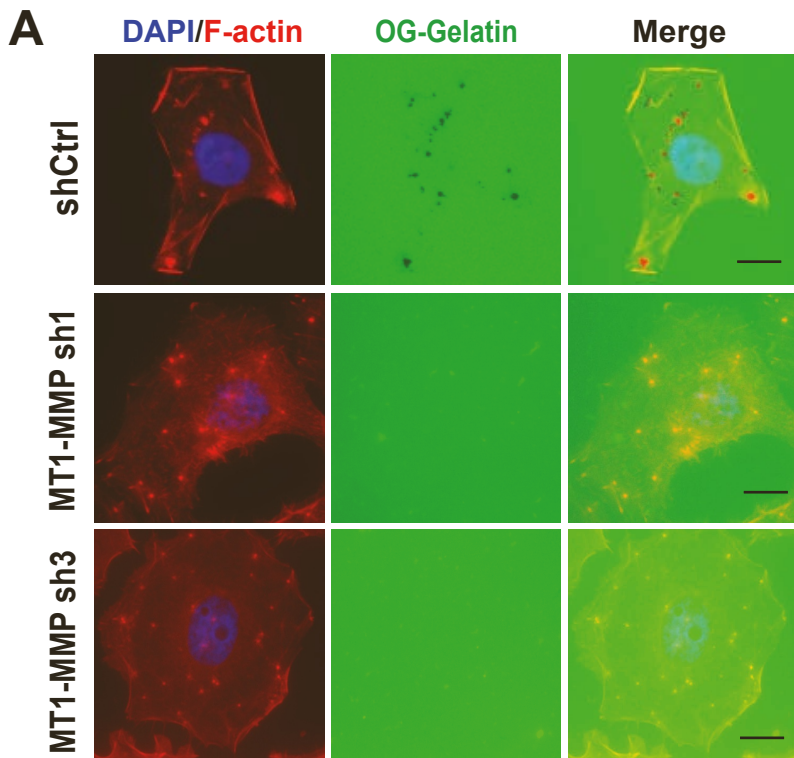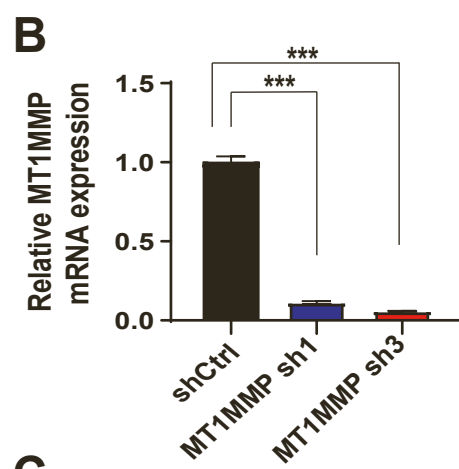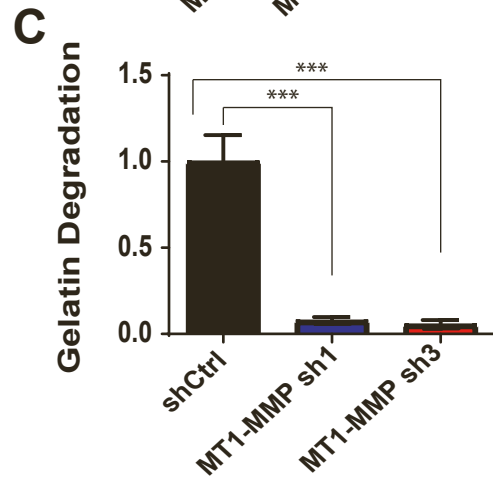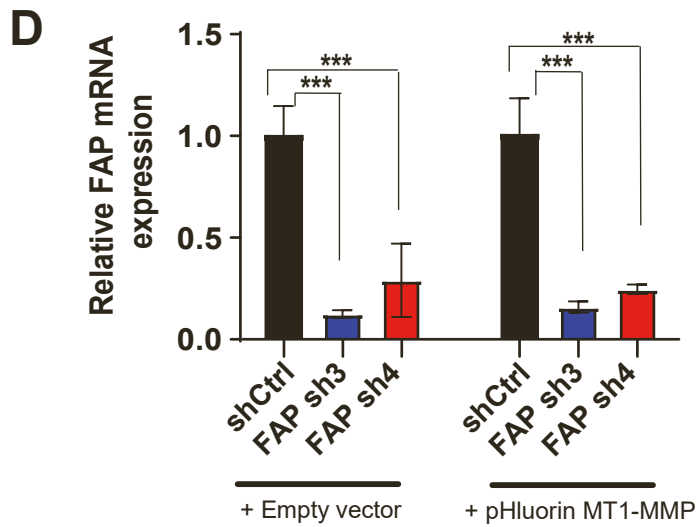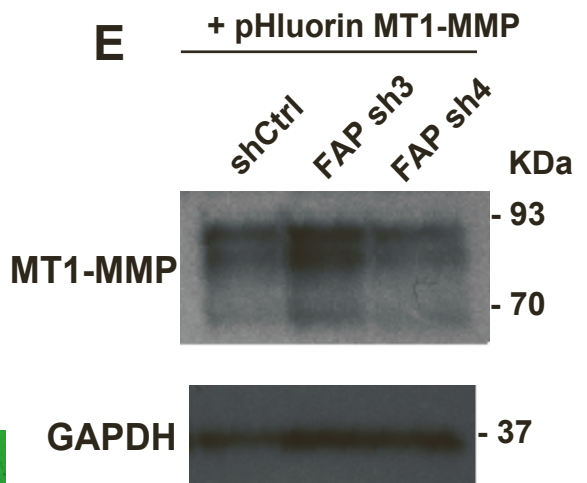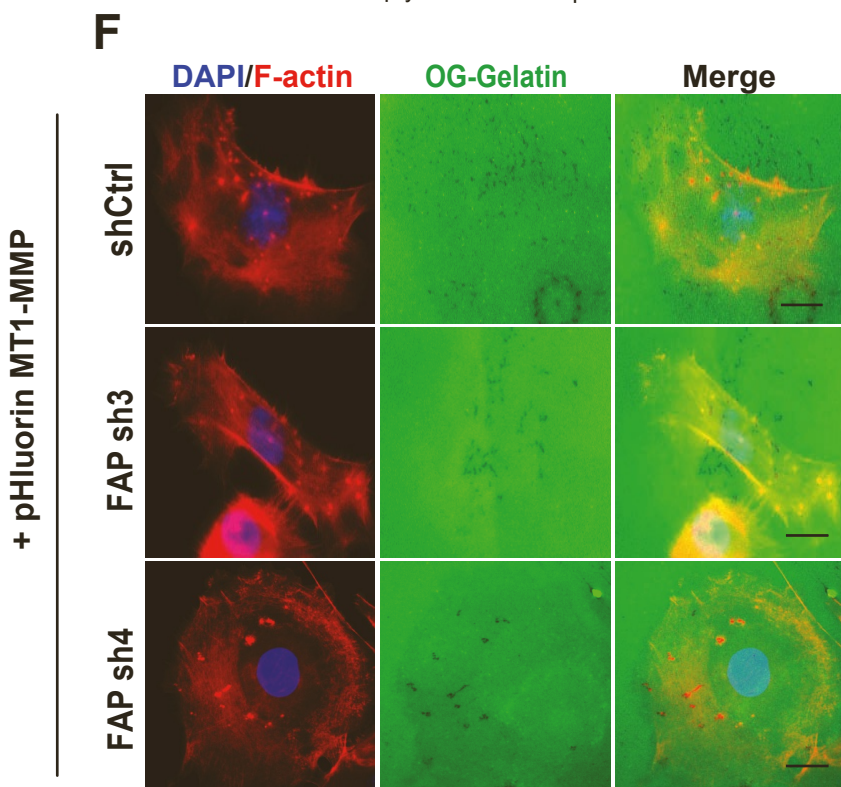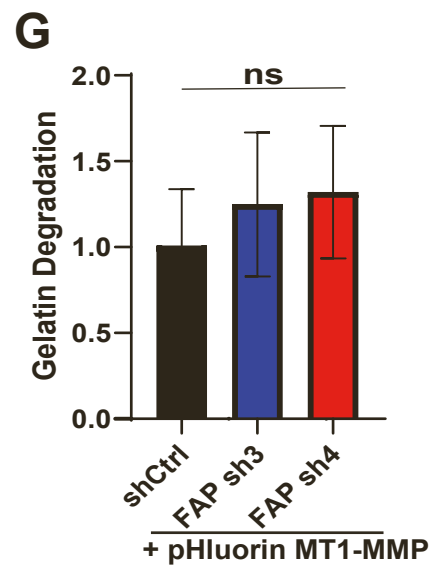

**Supplemental Figure 5. MT1-MMP overexpression rescues the invadopodia-mediated matrix degradation defects caused by FAP knockdown, Related to Figure 7.** A) SCC61 cells expressing MT1-MMP shRNAs were seeded onto Oregon green gelatin for 16 hours and then fixed and stained for F-actin (red) and nuclei (blue). B) qPCR analysis of MT1-MMP mRNA level in SCC61 cells expressing MT1-MMP shRNAs and normalized to the control shRNA. Error bars represent SD. C) Quantification of gelatin degradation from (A) normalized to the control shRNA. Error bars represent SEM. N = 150 cells per group. \*\*\*p < 0.001. Student's t-test. D) qPCR analysis of FAP mRNA level in SCC61 cells expressing FAP shRNAs alongside either empty vector or MT1-MMP pHluorin. Error bars represent SD. E) Protein lysates from SCC61 cells expressing MT1-MMP pHluorin and FAP shRNAs were probed for MT1-MMP. GAPDH was used as loading control. F) SCC61 cells expressing MT1-MMP pHluorin and FAP shRNAs were seeded onto Oregon green gelatin for 16 hours in presence of GM6001 (10 $\mu$ M), GM6001 was then removed, and cells were incubated in culturing media for 1 hour followed by fixation and staining for F-actin (red) and nuclei (blue). G) Quantification of gelatin degradation from (F) and normalized to control shRNA. N=150 cells per group. Error bars represent SEM. \*\*p < 0.01, \*\*\*p < 0.001, ns: not significant (p > 0.05). Student's t-test. Scale bar represents 10 $\mu$ m.

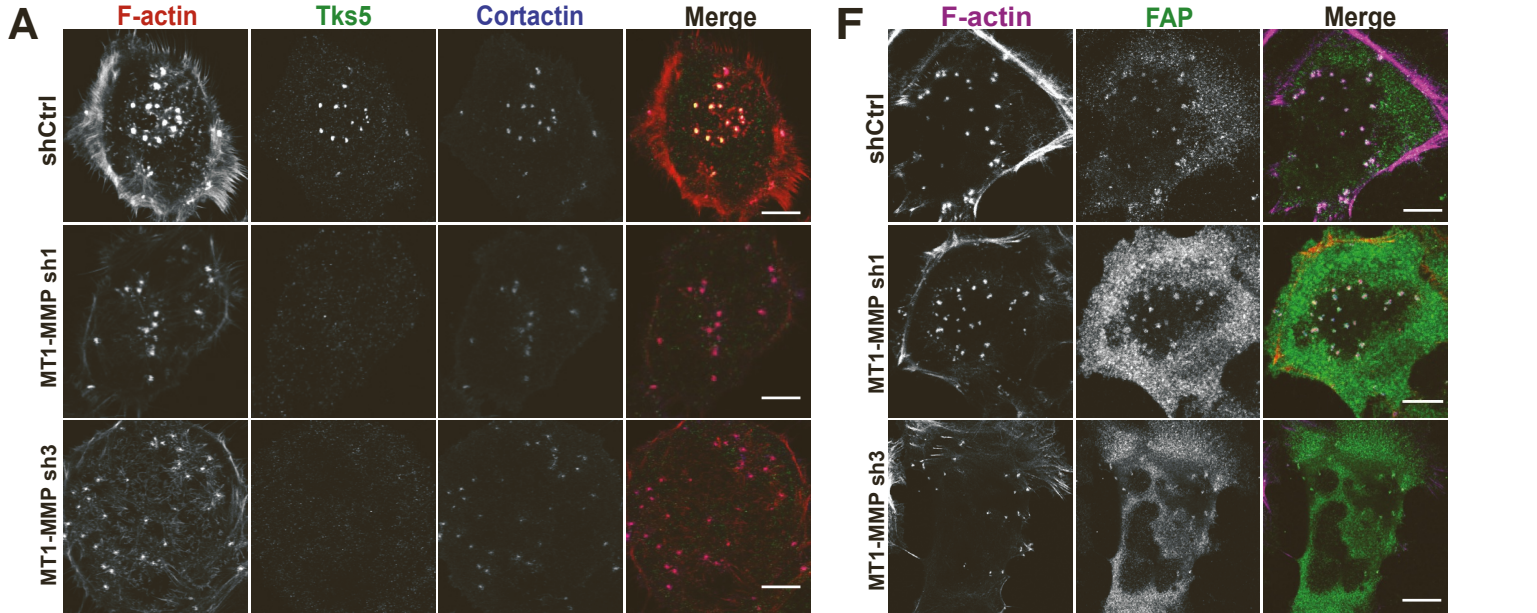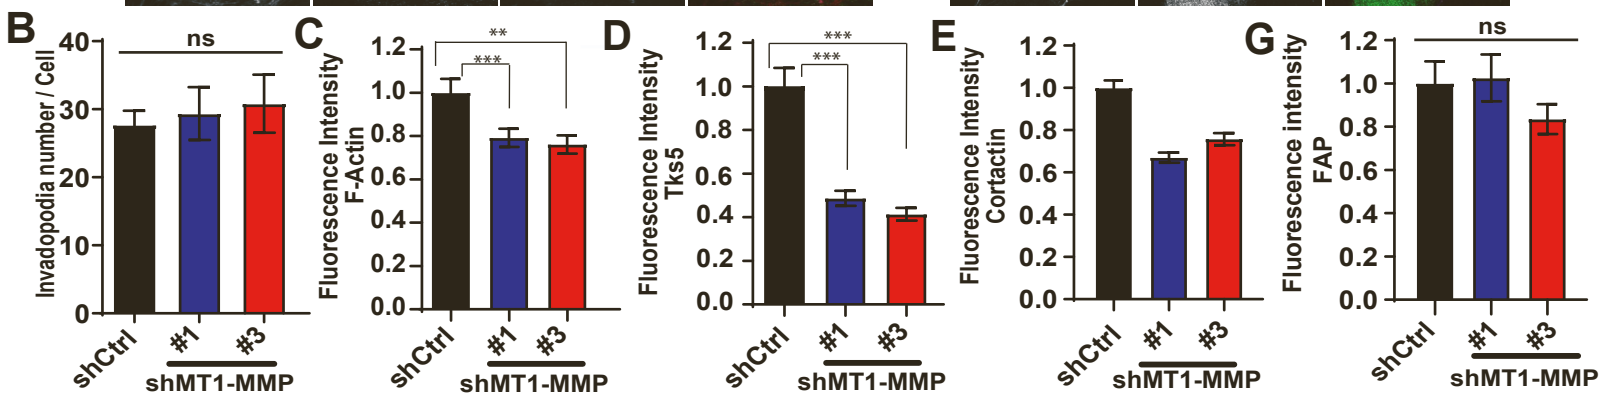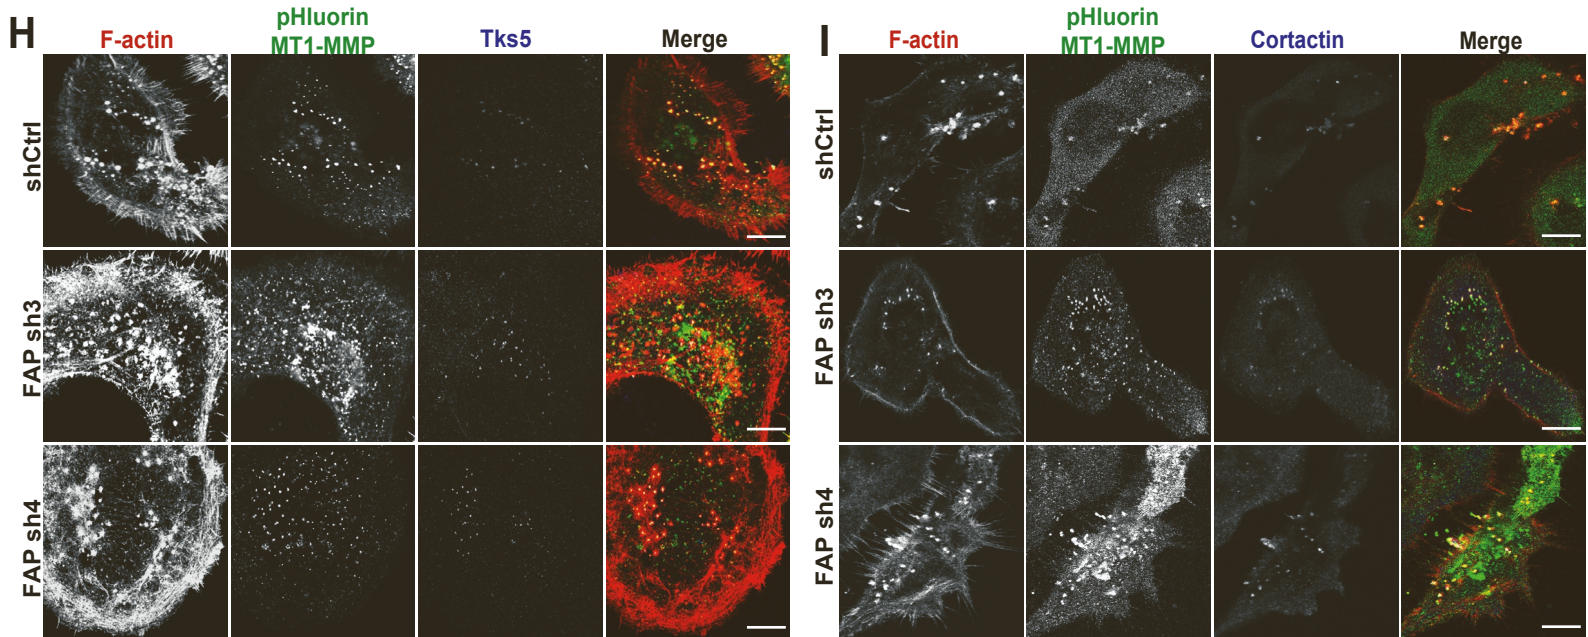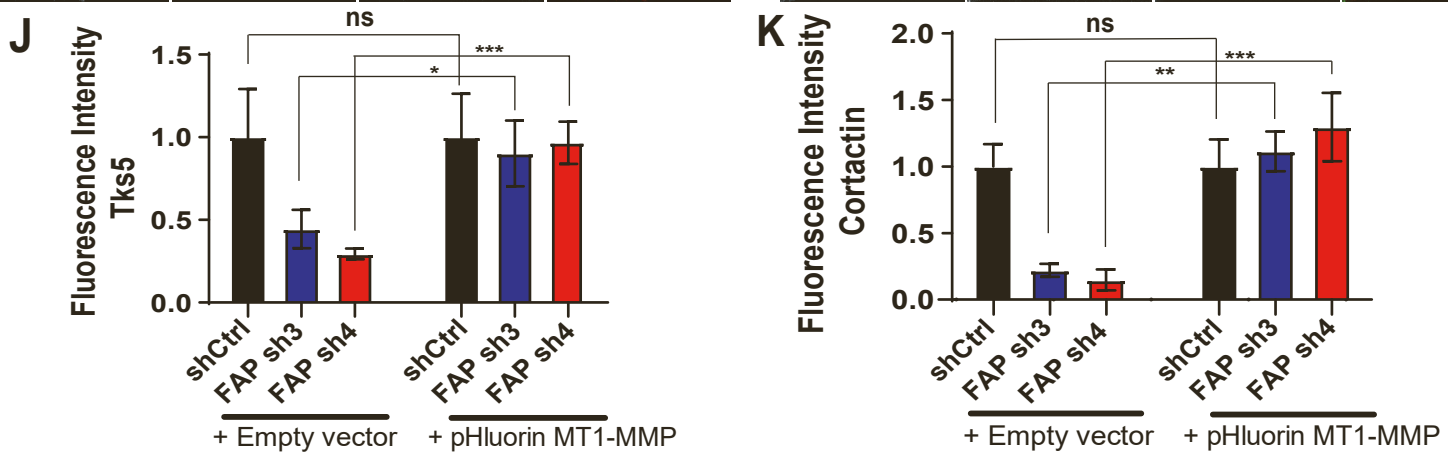

**Supplemental Figure 6. MT1-MMP overexpression rescues the invadopodia structural defects caused by FAP knockdown, Related to Figure 7.** A) SCC61 cells expressing MT1-MMP shRNAs were seeded onto gelatin-coated coverslips for 48 hours and labelled for F-actin (red), Tks5 (green), cortactin (blue). Quantification of Tks5 (D) and cortactin (E) signal intensity per invadopodia normalized to the control shRNA. Quantification of invadopodia precursor number per cell (B), and F-actin signal intensity per invadopodia normalized to the control shRNA (C) in SCC61 cells expressing MT1-MMP shRNAs. F) SCC61 cells expressing MT1-MMP shRNAs were seeded onto gelatin-coated coverslips for 48hr and labelled for F-actin (magenta) and FAP (green). G) Quantification of FAP fluorescence intensity at invadopodia relative to the control shRNA. MT1-MMP-pHluorin (green) was overexpressed in SCC61 cells expressing FAP shRNAs and seeded onto gelatin-coated coverslips for 48 hours and labelled for TKS5 (blue) (H) and cortactin (blue) (I), and F-actin (red). Quantification of Tks5 (J) and cortactin (K) at invadopodia in pHluorin MT1-MMP expressing cells relative to corresponding SCC61 FAP knockdown cells overexpressing empty vector shows rescue in Tks5 and cortactin recruitment at invadopodia in pHluorin MT1-MMP expressing cells. Error bars in all the graphs represent SEM. \*\*\* $p < .001$ , \*\* $p < .01$ , \* $p < .05$ , n.s.: not significant ( $p > .05$ ). N = >20 cells per group. Student's t-test. Scale bar represents 10 $\mu$ m.

**Supplementary Table 1, Primers used in this study, Related to STAR Methods and the Key Resources Table.**

| <b>Name</b>                     | <b>Sequence</b>                       |
|---------------------------------|---------------------------------------|
| hHPRT_qPCR_fwd                  | ACGTCTTGCTCGAGATGTGA                  |
| hHPRT_qPCR_rev                  | TCCCCTGTTGACTGGTCATT                  |
| hFAP_qPCR_fwd                   | AATGAGAGCACTCACACTGAAG                |
| hFAP_qPCR_rev                   | CCGATCAGGGTGATAAGCCGTAAT              |
| hDPP4_qPCR_fwd                  | TCCTGATGGGCAGTTTATTCTCT               |
| hDPP4_qPCR_rev                  | CATGTGACCCACTGTGTGTTG                 |
| hMMP14_qPCR_fwd                 | GAAGCCTGGCTACAGCAATATG                |
| hMMP14_qPCR_rev                 | TGCAAGCCGTAAAACCTTCTGC                |
| FAP sh3-resistant WT<br>FAP fwd | GTGCATTGTCTTAAGACCAAGTAGAGTTCATAACTCT |
| FAP sh3-resistant WT<br>FAP rev | AGAGTTATGAACTCTACTTGGTCTTAAGACAATGCAC |
| FAP sh5-resistant WT<br>FAP fwd | GGATGATAATCTTGAACATTACAAGAATTCAACTGTG |
| FAP sh5-resistant WT<br>FAP rev | CACAGTTGAATTCTTGTAATGTTCAAGATTATCATCC |
| FAP S624A_fwd                   | CATATGGGGCTGGGCCTATGGAGGATAC          |
| FAP S624A_rev                   | GTATCCTCCATAGGCCAGCCCCATATG           |
| FAP A657S_fwd                   | CCAGCTGGGAATATTACTCGTCTGTCTACACAGAG   |
| FAP A657S_rev                   | CTCTGTGTAGACAGACGAGTAATATCCCAGCTGG    |
